1 **Temperature preference biases parental genome retention during hybrid evolution**

2

3 Caiti Smukowski Heil<sup>1</sup>, Christopher R. L. Large<sup>1</sup>, Kira Patterson<sup>1,2</sup>, and Maitreya J. Dunham<sup>1\*</sup>

4

5 <sup>1</sup>Genome Sciences Department, University of Washington, Seattle, WA

6 <sup>2</sup>Current address: National Heart, Lung, and Blood Institute, Bethesda, MD

7 \*Corresponding author: [maitreya@uw.edu](mailto:maitreya@uw.edu)

8

## 9 **Abstract**

10 Interspecific hybridization can introduce genetic variation that aids in adaptation to new or  
11 changing environments. Here we investigate how the environment, and more specifically  
12 temperature, interacts with hybrid genomes to alter parental genome representation over time.  
13 We evolved *Saccharomyces cerevisiae* x *Saccharomyces uvarum* hybrids in nutrient-limited  
14 continuous culture at 15°C for 200 generations. In comparison to previous evolution experiments  
15 at 30°C, we identified a number of temperature specific responses, including the loss of the *S.*  
16 *cerevisiae* allele in favor of the cryotolerant *S. uvarum* allele for several portions of the hybrid  
17 genome. In particular, we discovered a genotype by environment interaction in the form of a  
18 reciprocal loss of heterozygosity event on chromosome XIII. Which species haplotype is lost or  
19 maintained is dependent on the parental species temperature preference and the temperature at  
20 which the hybrid was evolved. We show that a large contribution to this directionality is due to  
21 temperature sensitivity at a single locus, the high affinity phosphate transporter *PHO84*. This  
22 work helps shape our understanding of what forces impact genome evolution after hybridization,  
23 and how environmental conditions may favor or disfavor hybrids over time.  
24

## 25 **Introduction**

26 Comparative genomics of thousands of plants, animals, and fungi has revealed that  
27 portions of genomes from many species are derived from interspecific hybridization, indicating  
28 that hybridization occurs frequently in nature. However, the influence of processes such as  
29 selection, drift, and/or the presence or absence of backcrossing to a parental population on hybrid  
30 genome composition in incipient hybrids remains largely unknown. In some cases, hybrids will  
31 persist with both parental genomes in fairly equal proportions as new hybrid species or lineages,  
32 while in other instances, hybrid genomes will become biased towards one parent sub-genome  
33 over time [1-9]. Untangling the genetic and environmental factors that lead to these outcomes is  
34 a burgeoning field.

35 Some hybrid genotypes will be unfit due to genetic hybrid incompatibilities or cytotype  
36 disadvantage; decades of work across many systems have illustrated examples of hybrid sterility  
37 and inviability [10]. Recent work has demonstrated that in hybrid genomes with a bias in  
38 parental composition like humans, in which most of the genome is comprised of modern human  
39 haplotypes with small fragments derived from archaic human, regions from the minor parent  
40 (e.g., Neanderthal or Denisovan) are decreased near functional elements and hybrid  
41 incompatibilities [11-13]. Conversely, there are examples of “adaptive introgression,” in which  
42 alleles from the minor parent confer a benefit, like wing patterning in butterflies, high altitude  
43 tolerance in the Tibetan human population, and winter color morphs in the snowshoe hare [14-  
44 21]. The environment undoubtedly plays a significant role in hybrid fitness, and genotype by  
45 environment interactions will shape hybrid fitness in a similar manner as they shape non-hybrid  
46 fitness. For example, there is general acceptance that the *Saccharomyces* species complex is  
47 largely void of genic incompatibilities (with exceptions [22] ), however most experiments

48 looking for incompatibilities have used laboratory conditions. Hou *et al.* utilized different carbon  
49 sources, chemicals, and temperatures to show that over one-fourth of intraspecific crosses show  
50 condition-specific loss of offspring viability [23]. This is echoed by many examples of condition  
51 specific hybrid incompatibility in plants [24-29]. Similarly, there are numerous examples of  
52 environment dependent high fitness hybrid genotypes [30] [31-39] , exemplified by classic  
53 research showing Darwin's finch hybrids with different beak shapes gained a fitness benefit  
54 during and after an El Nino event [15].

55         The budding yeasts in the genus *Saccharomyces* have emerged as a particularly adept  
56 system to study genome evolution following hybridization. Recent evidence supports the  
57 hypothesis that the long-recognized whole genome duplication that occurred in the common  
58 ancestor that gave rise to *Saccharomyces* resulted from hybridization [40], and led to speculation  
59 that ancient hybridization could also explain other whole genome duplications in plants and  
60 animals [41]. Introgression and hybridization have also been detected across the *Saccharomyces*  
61 clade [42-48]; most famously, the lager brewing lineage *S. pastorianus* is a hybrid between *S.*  
62 *cerevisiae* and *S. eubayanus* [49-54]. A bias towards one parent sub-genome was identified in the  
63 ancient hybridization event and in *S. pastorianus*, and selection is inferred to be important in this  
64 process [1,40].

65         To empirically understand the genomic changes that occur as a hybrid adapts to a new  
66 environment, we previously created *de novo* interspecific hybrids between two yeast species, *S.*  
67 *cerevisiae* and *S. uvarum*, which are approximately 20 million years divergent and differ in a  
68 range of phenotypes, notably in preferred growth temperature. *S. uvarum* has been isolated from  
69 oak trees and associated soil in Patagonia and similar habitats across the world, and is  
70 specifically known for fermentation of cider and wines at cold temperatures [55-58]. Many *S.*

71 *uvarum* strains show evidence of introgression from several other yeast species, and *S. cerevisiae*  
72 x *S. uvarum* hybrids have been isolated from fermentation environments [55,59].

73         We previously evolved *S. cerevisiae* x *S. uvarum* hybrids in the laboratory in several  
74 nutrient-limited environments at the preferred growth temperature of *S. cerevisiae* [60]. We  
75 frequently observed a phenomenon known as loss of heterozygosity (LOH) in these evolved  
76 hybrids, in which an allele from one species is lost while the other species' allele is maintained.  
77 The outcome of such events is the homogenization of the hybrid genome at certain loci, and  
78 represents a way in which a hybrid genome may become biased toward one parent's sub-  
79 genome. This type of mutation can occur due to gene conversion or break induced repair, and as  
80 previously noted, has also been observed in organisms including *S. pastorianus*, pathogenic  
81 hybrid yeast, and hybrid plants, but its role in adaptation has been unclear [47,61,62]. We used  
82 genetic manipulation and competitive fitness assays to show that a particular set of LOH events  
83 was the result of selection on the loss of the *S. uvarum* allele and amplification of the *S.*  
84 *cerevisiae* allele at the high affinity phosphate transporter *PHO84* in phosphate limited  
85 conditions. By empirically demonstrating that LOH can be the product of selection, we  
86 illuminated how an underappreciated mutation class can underlie adaptive hybrid phenotypes.

87         This prior study illuminated how the environment (differences in nutrient availability)  
88 can bias a hybrid genome towards one parent sub-genome. Due to many examples of genotype  
89 by temperature interaction in hybrids across many taxa, and in particular difference in species  
90 temperature preference in our hybrids, we speculated that temperature is an important  
91 environmental modifier which may influence parental sub-genome representation in hybrids.  
92 Temperature can perturb fundamentally all physiological, developmental, and ecological  
93 processes, and as such, temperature is an essential factor in determining species distribution and

94 biodiversity at temporal and spatial scales [63-65]. We hypothesized that in *S. cerevisiae* x *S.*  
95 *uvarum* hybrids, *S. cerevisiae* alleles may be favored at warmer temperatures, whereas *S. uvarum*  
96 alleles may be preferred at colder temperatures, giving the hybrid an expanded capacity to adapt.  
97 To test how temperature influences hybrid genome composition over time, we evolved the same  
98 interspecific hybrid yeast in the laboratory at 15°C for 200 generations. In comparing laboratory  
99 evolution at 15°C and 30°C, we present evidence that temperature can indeed bias hybrid  
100 genome composition towards one parental sub-genome, and we focus on a reciprocal LOH event  
101 at the *PHO84* locus. We show that which species' allele is lost or maintained at this locus is  
102 dependent on the parental species' temperature preference and the temperature at which the  
103 hybrid was evolved, thus revealing a genotype by environment interaction. Our results are one of  
104 the first clear examples with a molecular genetic explanation of how hybrids have expanded  
105 adaptive potential by maintaining two genomes, but also how adapting to one condition may  
106 abrogate evolutionary possibilities in heterogeneous environments.

107

## 108 **Results**

### 109 *Laboratory evolution of hybrids and their parents at cold temperatures*

110 To test whether temperature can influence the direction of resolution of hybrid genomes,  
111 we evolved 14 independent populations of a *S. cerevisiae* x *S. uvarum* hybrid in nutrient-limited  
112 media at 15° C for 200 generations (phosphate-limited: 6 populations; glucose-limited: 4  
113 populations; sulfate-limited: 4 populations). Diploid *S. cerevisiae* and *S. uvarum* populations  
114 were evolved in parallel (4 populations of *S. cerevisiae* and 2 populations of *S. uvarum* in each of  
115 the three nutrient limited conditions). Populations were sampled from the final timepoint and  
116 submitted for whole genome sequencing and analysis.

117

118 *Loss of S. cerevisiae alleles in cold evolved hybrids*

119 We detected large scale copy number variants in our cold evolved populations, including  
 120 whole and partial chromosome aneuploidy and loss of heterozygosity (**Table 1; Tables S1-S2;**  
 121 **Figures S1-S7**). Previously, in hybrids evolved at 30°C, we observed more LOH events in which  
 122 the *S. uvarum* allele was lost (5/9 LOH events), and found a significant preference for *S.*  
 123 *cerevisiae* partial and whole chromosome amplification [60]. In contrast, in hybrids evolved at  
 124 15°C, we observe 6/6 LOH events in which the *S. cerevisiae* allele is lost and the *S. uvarum*  
 125 allele is maintained, suggestive of a *S. uvarum* cold temperature benefit. While our sample sizes  
 126 are modest, together these results indicate that temperature can determine hybrid genomic  
 127 composition in the generations following a hybridization event.

128

129 **Table 1: Mutations in cold-evolved hybrid populations**

| Population | Location                                                                         | Gene(s)                            | Mutation                                                                                 |
|------------|----------------------------------------------------------------------------------|------------------------------------|------------------------------------------------------------------------------------------|
| P1-15°     | <i>S. cerevisiae</i><br>chrXVI: 772650                                           | <i>CLB2</i>                        | coding-nonsynonymous: D333A                                                              |
|            | <i>S. uvarum</i> chrVII:<br>818275                                               | <i>UBR1</i>                        | coding-nonsynonymous: F1634C                                                             |
|            | <i>S. uvarum</i> chrXI:<br>5832                                                  | <i>JEN1</i>                        | 5'-upstream                                                                              |
|            | <i>S. cerevisiae</i><br>chrXIII: 1-81102<br><i>S. uvarum</i> chrXIII:<br>1-82283 | 41 genes<br>including <i>PHO84</i> | LOH: loss of <i>S. cerevisiae</i> allele and<br>amplification of <i>S. uvarum</i> allele |
|            | <i>S. cerevisiae</i><br>chrXIII: 81102-<br>168343                                | 47 genes                           | CNV: Segmental amplification of <i>S.</i><br><i>cerevisiae</i>                           |
| P2-15°     | <i>S. uvarum</i> chrIV:<br>903941                                                | <i>YBR259W</i>                     | coding-nonsynonymous: S624Y                                                              |
| P2F-15°    | <i>S. uvarum</i> chrV:<br>179951                                                 | <i>YAT2</i>                        | coding-synonymous                                                                        |
| P3-15°     | <i>S. uvarum</i> chrXI:<br>101238                                                | <i>LST4</i>                        | coding-nonsynonymous: S533A                                                              |
|            | <i>S. cerevisiae</i><br>chrXIII: 1-79085                                         | 40 genes<br>including <i>PHO84</i> | LOH: loss of <i>S. cerevisiae</i> allele and<br>amplification of <i>S. uvarum</i> allele |

|                |                                                        |                    |                                                        |
|----------------|--------------------------------------------------------|--------------------|--------------------------------------------------------|
|                | <i>S. uvarum</i> chrXIII:1-80181                       |                    |                                                        |
|                | <i>S. cerevisiae</i> chrXIII:79085-168343              | 48 genes           | Segmental amplification of <i>S. cerevisiae</i>        |
| <b>G7-15°</b>  | <i>S. cerevisiae</i> chrXI:80553                       | <i>ACP1</i>        | 5' upstream                                            |
|                | <i>S. cerevisiae</i> chrIV:651345-871844               | 118 genes          | Segmental amplification <i>S. cerevisiae</i> allele    |
|                | <i>S. uvarum</i> chrII:554234-1289935                  | 159 genes          | Segmental amplification <i>S. uvarum</i> allele        |
|                | <i>S. cerevisiae</i> chrXV:976083-1071297              | 46 genes           | LOH: loss of <i>S. cerevisiae</i> allele               |
| <b>G8-15°</b>  | <i>S. cerevisiae</i> chrIV:955826                      | <i>VHS1</i>        | 5'-upstream                                            |
|                | <i>S. cerevisiae</i> chrV:321068                       | <i>AIM9</i>        | coding-nonsynonymous: A369V                            |
|                | <i>S. cerevisiae</i> chrXI:80553                       | <i>CCP1</i>        | 5'-upstream                                            |
|                | <i>S. cerevisiae</i> chrXV:977571                      | <i>TYE7</i>        | coding-nonsynonymous: E167K                            |
|                | <i>S. uvarum</i> chrXV:685069                          | <i>IKI1</i>        | coding-nonsynonymous: A2E                              |
|                | <i>S. cerevisiae</i> chrIII:169495-316620              | 82 genes           | LOH: loss of <i>S. cerevisiae</i> allele               |
|                | <i>S. cerevisiae</i> chrXII:732111-1078177             | 181 genes          | Segmental amplification of <i>S. cerevisiae</i> allele |
|                | <i>S. cerevisiae</i> chrXV:340969-464306,464306-594878 | 71 genes, 72 genes | LOH: loss of <i>S. cerevisiae</i> allele               |
| <b>G9-15°</b>  | <i>S. cerevisiae</i> chrXII:812389                     | <i>FKS1</i>        | coding-nonsynonymous: S798Y                            |
|                | <i>S. cerevisiae</i> chrXII:818575-1078177             | 136 genes          | Segmental amplification of <i>S. cerevisiae</i> allele |
|                | <i>S. cerevisiae</i> chrXV:976083-1071297              | 46 genes           | LOH: loss of <i>S. cerevisiae</i> allele               |
| <b>G10-15°</b> | <i>S. cerevisiae</i> chrXV:1034298                     | <i>GPB1</i>        | 5' upstream                                            |
| <b>S7-15°</b>  | <i>S. cerevisiae</i> chrXII:238463                     | <i>YLR046C</i>     | coding-nonsynonymous: M117I                            |
|                | <i>S. cerevisiae</i> chrXII:1047895                    | <i>FMP27</i>       | coding-nonsynonymous: P1300S                           |



|                |                                             |                                   |                                                        |
|----------------|---------------------------------------------|-----------------------------------|--------------------------------------------------------|
|                | <i>S. cerevisiae</i><br>chrII:786030-813184 | 12 genes<br>including <i>SUL1</i> | Segmental amplification of <i>S. cerevisiae</i> allele |
| <b>S8-15°</b>  | <i>S. cerevisiae</i><br>chrIX:212119        | <i>AIR1</i>                       | 5' upstream                                            |
|                | <i>S. cerevisiae</i><br>chrIX:212130        | <i>AIR1</i>                       | 5' upstream                                            |
|                | <i>S. cerevisiae</i><br>chrII:786025-813184 | 12 genes<br>including <i>SUL1</i> | Segmental amplification of <i>S. cerevisiae</i> allele |
| <b>S9-15°</b>  | <i>S. cerevisiae</i><br>chrII:786017-813184 | 12 genes<br>including <i>SUL1</i> | Segmental amplification of <i>S. cerevisiae</i> allele |
| <b>S10-15°</b> | <i>S. uvarum</i> chrXIII:<br>752118         | <i>GTO3</i>                       | 5' upstream                                            |
|                | <i>S. uvarum</i><br>chrXVI: 456125          | <i>SUR1</i>                       | 5' upstream                                            |
|                | <i>S. cerevisiae</i><br>chrII:770240-813184 | 21 genes<br>including <i>SUL1</i> | Segmental amplification of <i>S. cerevisiae</i> allele |

130 LOH: loss of heterozygosity; CNV: copy number variant. No mutations were detected in populations P4-  
131 15°, P5-15°, or P6-15°. Breakpoints of CNV and LOH are approximate.

132

133 Copy number changes, and specifically amplification of nutrient transporter genes, are  
134 well-recognized paths to adaptation in laboratory evolution in nutrient limited conditions  
135 [48,60,66-75]. Similar to previous studies, we find both chromosomal aneuploidy and LOH are  
136 nutrient limitation specific, with repeatable genomic changes occurring in replicate populations  
137 under the same nutrient condition, but few if any changes shared across nutrients. In glucose  
138 limitation, 3/4 hybrid populations experienced chromosome XV LOH, losing the *S. cerevisiae*  
139 allele for portions of the chromosome. Haploidization of one of these implicated regions on  
140 chromosome XV was previously observed in *S. cerevisiae* diploids evolved at 30°C in glucose  
141 limitation [60,73], but it was not observed in any previously evolved hybrids, and which genes  
142 may be responsible for fitness increases are unclear. In sulfate limitation, we recapitulate  
143 previous hybrid laboratory evolution results [60], observing the amplification of the *S. cerevisiae*  
144 high affinity sulfate transporter gene *SUL1* in low sulfate conditions (4/4 hybrids, **Figures S1,**

145 **S2**). Amplification of *S. cerevisiae* *SUL1* therefore seems to confer a high relative fitness  
146 regardless of temperature (see section below, “Pleiotropic fitness costs resulting from loss of  
147 heterozygosity”). Though prior work showed highly repeatable amplification of *S. cerevisiae*  
148 *SUL1* at 30°C in *S. cerevisiae* haploids and diploids [60,66,73-75], and amplification of *S.*  
149 *uvarum* *SUL2* after approximately 500 generations at 25°C in *S. uvarum* diploids [75], we never  
150 observed amplification of *SUL1* or *SUL2* in *S. cerevisiae* or *S. uvarum* diploids at 15°C, albeit  
151 our experiments were terminated at 200 generations.

152 Finally and most notably, in low phosphate conditions, we discovered a LOH event in  
153 which the *S. cerevisiae* allele is lost and *S. uvarum* allele is amplified on chromosome XIII,  
154 which encompasses the high affinity phosphate transporter *PHO84* locus (2/6 hybrid  
155 populations; **Figure 1A**). The directionality of this LOH event is the opposite outcome of our  
156 observations of hybrids evolved at 30° C, in which the *S. cerevisiae* allele was amplified and the  
157 *S. uvarum* allele was lost in this same region (3/6 populations, **Figure 1A**). The direction of  
158 resolution of these LOH events thus appears to be modulated by temperature.

159

A.

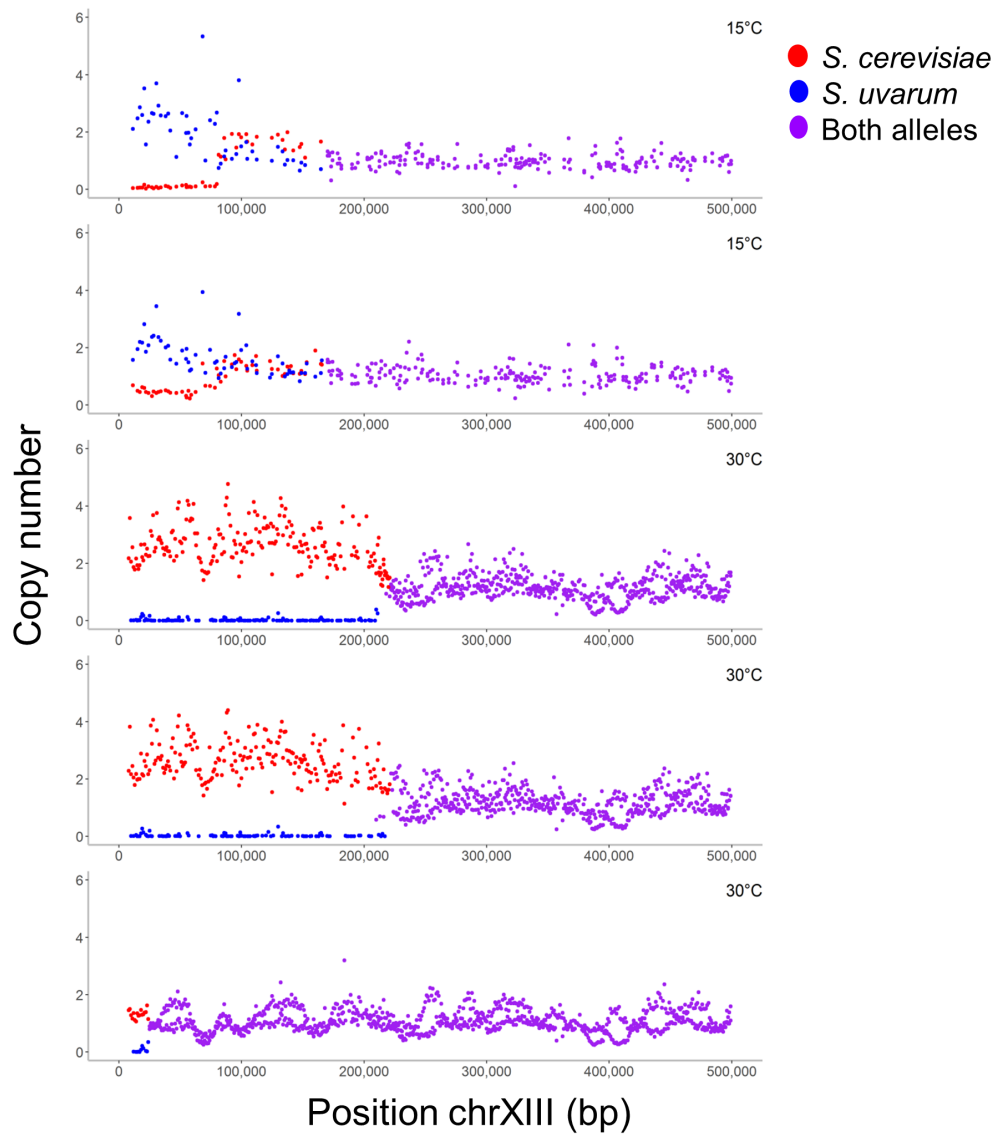

B.

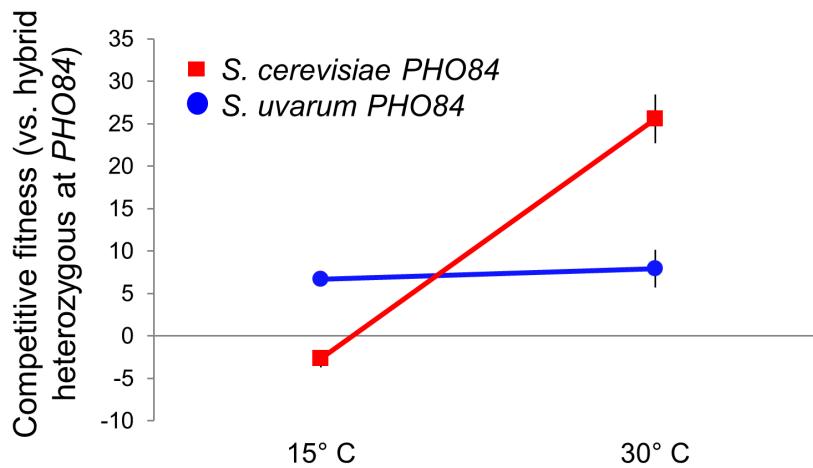

161 **Figure 1: Loss of heterozygosity directionality results from selection on different species'**  
162 **alleles at different temperatures**

163 **A.** Evolved hybrids exhibit reciprocal loss of heterozygosity on chromosome XIII encompassing  
164 the high affinity phosphate transporter gene *PHO84* in phosphate limited conditions at different  
165 temperatures. 2/6 independent populations lost the *S. cerevisiae* allele when evolved at 15°C (top  
166 2 panels), 3/6 independent populations lost the *S. uvarum* allele when evolved at 30°C (bottom 3  
167 panels). Purple denotes a region where both alleles are present at a single copy, blue denotes a *S.*  
168 *uvarum* change in copy number, red denotes a *S. cerevisiae* change in copy number. Note, copy  
169 number was derived from sequencing read depth. Clone sequencing was utilized for experiments  
170 at 30°C and population sequencing was utilized for experiments at 15°C, so exact population  
171 frequency and copy number changes are unclear for experiments at 15°C. **B.** Allele swap  
172 experiments in which a hybrid with one allele of *PHO84* from each species is competed against a  
173 hybrid with both copies of *PHO84* either from *S. cerevisiae* (*ScPHO84/ScPHO84*; red) or *S.*  
174 *uvarum* (*SuPHO84/SuPHO84*; blue) reveal a fitness effect dependent on temperature.

175

176 *Environment-dependent loss of heterozygosity aids in temperature adaptation in hybrids*

177 Based on previous results that demonstrated that LOH at the *PHO84* locus conferred a  
178 high fitness benefit at warm temperatures, we hypothesized that this apparent preference for the  
179 alternate species' allele in different environments is explained by a genotype by environment  
180 interaction at the *PHO84* locus itself. To test this hypothesis, we repeated the competitive fitness  
181 assays of allele-swapped strains from Smukowski Heil *et al.* (2017) at 15°C. These strains are  
182 either homozygous *S. cerevisiae*, homozygous *S. uvarum*, or heterozygous for both species at the  
183 *PHO84* locus in an otherwise isogenic hybrid background. Indeed, we demonstrate a fitness

184 tradeoff dependent on temperature, in which hybrids homozygous for *S. uvarum* *PHO84* show a  
185 fitness increase of 6.69% (+/-0.49) at 15°C relative to their hybrid ancestor, which carries a copy  
186 of each species' *PHO84* allele. In contrast, hybrids homozygous for *S. cerevisiae* *PHO84* show a  
187 slight relative fitness decrease (-2.67% +/-1.00) at this temperature (**Figure 1B**). There is a  
188 significant difference between fitness of hybrids homozygous for *S. cerevisiae* *PHO84* at  
189 different temperatures ( $p < 0.001$ , Welch Two Sample t-test), suggesting the *S. cerevisiae* allele of  
190 *PHO84* is temperature sensitive.

191

### 192 *Pleiotropic fitness costs resulting from loss of heterozygosity*

193 We clearly demonstrate a fitness trade-off dependent on temperature at the *PHO84* locus. To  
194 explore if other mutations in evolved hybrids demonstrate antagonistic pleiotropy at divergent  
195 temperatures, we conducted a series of competitive fitness assays at 15°C and 30°C. We isolated  
196 two clones from each hybrid population evolved at 15°C, and competed the clone against a  
197 common unevolved hybrid ancestor in the nutrient limitation it was evolved in at both 15°C and  
198 30°C.

199 First, we sought to identify how the chromosome XIII LOH event influences fitness  
200 beyond the *PHO84* locus. We demonstrate that clones evolved in phosphate limitation with the  
201 chromosome XIII LOH event (homozygous *S. uvarum* *PHO84*; P1-15°C and P3-15°C) have  
202 higher competitive fitness at 15°C and decreased competitive fitness at 30°C, displaying  
203 antagonistic pleiotropy (**Figure 2A**). In contrast, clones isolated from populations without  
204 chromosome XIII LOH (P2-15°C, P4-15°C, P5-15°C, P6-15°C) have variable fitness responses  
205 at both temperatures. To compare these results to the reciprocal LOH event seen in hybrids  
206 evolved at 30°C in which hybrids became homozygous for *S. cerevisiae* *PHO84*, we competed

207 clones from populations initially evolved at 30°C at 15°C. Indeed, clones with the LOH event  
208 homozygous for *S. cerevisiae* *PHO84* (P3-30°C, P4-30°C, P5-30°C) have increased fitness at  
209 30°C and decreased fitness at 15°C (**Figure 2B**), consistent with the *PHO84* allele swap  
210 competitive fitness results. Of course, there are other mutations present in these clones, and some  
211 evidence that these fitness values may be influenced by the tract length of the LOH event, which  
212 ranges from approximately 79kb to 234kb. For example, P3-30°C has the shortest LOH tract at  
213 approximately 25kb in length and has a higher relative fitness at 15°C than either P4-30°C or P5-  
214 30°C, whose LOH tracts extend to 221kb and 234kb, respectively. The LOH tract length is  
215 approximately 80kb in both cold evolved populations (P1-15°C: 82,283; P3-15°C: 79,085), but is  
216 made more complex by the amplification of a portion of the *S. cerevisiae* sub-genome adjacent to  
217 the LOH event (P1-15°C: 81,105-168,345; P3-15°C: 79,074-168,345; **Figure 1A**). Together,  
218 these results support a temperature sensitive fitness response at the *PHO84* locus, but also imply  
219 that there may be other genes modulating fitness in the chromosome XIII LOH events,  
220 something we hope to explore in future work.

221

A.

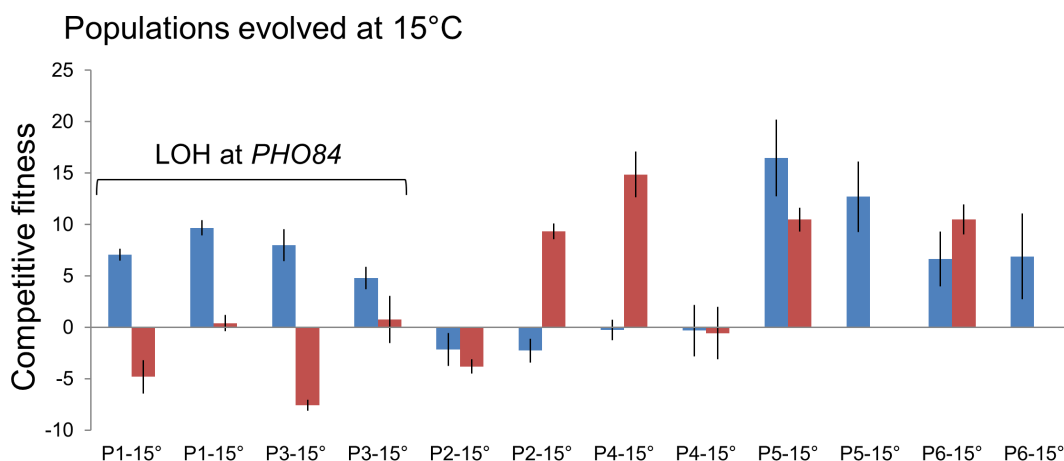

B.

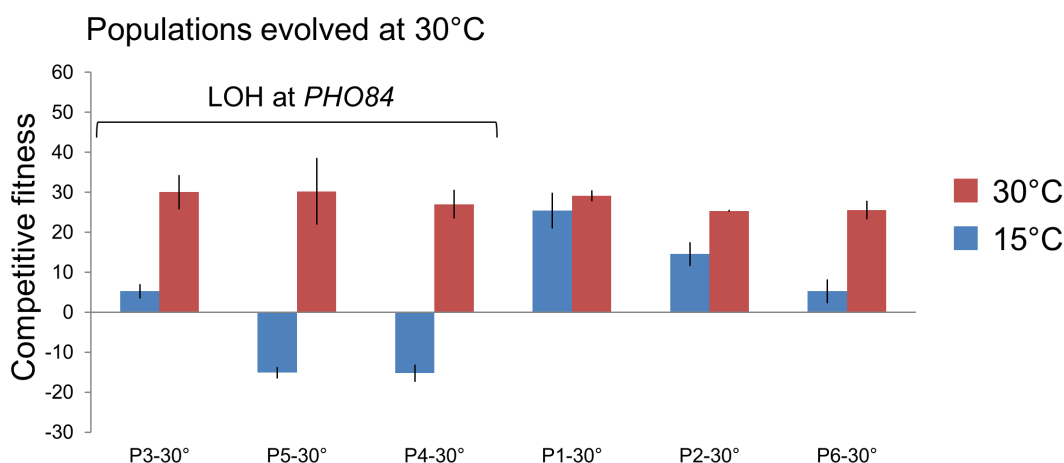

222

223 **Figure 2: Fitness assays demonstrate that loss of heterozygosity results in antagonistic**  
224 **pleiotropy**

225 **A.** One or two clones were isolated from each population evolved in phosphate limitation at  
226 15°C and competed against a common competitor, the hybrid ancestor of the evolution  
227 experiments, at 15°C (blue) and 30°C (red) in phosphate limitation. Clones with chromosome  
228 XIII loss of heterozygosity exhibited higher fitness relative to their ancestor at 15°C and neutral  
229 or negative fitness at 30°C. Error bars denote standard error from technical and/or biological  
230 replicates. **B.** Clones evolved in phosphate limitation at 30°C were competed against a common

231 competitor, the hybrid ancestor of the evolution experiments, at 15°C and 30°C in phosphate  
232 limitation. Data from 30°C fitness assays was obtained from [60]. Clones with chromosome XIII  
233 loss of heterozygosity exhibited higher fitness relative to their ancestor at 30°C and neutral or  
234 negative fitness at 15°C.

235

236 Results are variable from hybrid clones evolved in other media conditions at 15°C, with  
237 some clones having higher relative fitness at 15°C and lower fitness at 30°C, some clones  
238 showing the opposite trend, and some clones having similar fitness at both temperatures (**Table**  
239 **2**). It thus appears that temperature specific antagonistic pleiotropy, in which a clone has high  
240 fitness at one temperature and low fitness at the other temperature, is relatively rare, with the  
241 LOH encompassing *PHO84* being the only clear example (but see P2-C2, G9-C2). The only  
242 other distinct pattern in the fitness data is that all hybrids evolved in sulfate limitation  
243 demonstrate fitness gains at both 15°C and 30°C. All populations have an increased fitness of  
244 23.66-41.01% relative to their hybrid ancestor at 30°C, except for the clone from population S9-  
245 15°C. This result is in line with the observation of an amplification of *SUL1* at very low  
246 frequency and/or low copy number in this population compared to other sulfate limited evolved  
247 populations (**Figure S1**). These data suggest that an amplification of *S. cerevisiae* *SUL1* confers  
248 a fitness benefit at both cold and warm temperatures, but is most beneficial at warm  
249 temperatures.

250



251 **Table 2: Competitive fitness of hybrids at two temperatures**

| Population Identifier | Original evolution conditions | Relative Fitness at 15°C (+/-S.E.)         | Relative Fitness at 30°C (+/- S.E.)        |
|-----------------------|-------------------------------|--------------------------------------------|--------------------------------------------|
| G7-15°                | Glucose limitation, 15°C      | C1: -0.66<br>C2: 6.37 (+/-3.96)            | C1: 1.86<br>C2: 6.63 (+/-1.39)             |
| G8-15°                | Glucose limitation, 15°C      | C1: 2.65 (+/-0.85)<br>C2: 14.83 (+/-3.63)  | C2: 2.07 (+/-3.91)                         |
| G9-15°                | Glucose limitation, 15°C      | C1: 6.40 (+/-0.28)<br>C2: 11.76            | C1: 10.10 (+/-2.83)<br>C2: -2.45 (+/-1.68) |
| G10-15°               | Glucose limitation, 15°C      | C1: 5.14 (+/-0.03)                         | C1: 13.06 (+/-4.60)                        |
| S7-15°                | Sulfate limitation, 15°C      | C1: 7.43 (+/-0.27)<br>C2: 28.52 (+/-1.42)  | C1: 23.66<br>C2: 30.12 (+/-10.20)          |
| S8-15°                | Sulfate limitation, 15°C      | C1: 18.55 (+/-3.98)<br>C2: 30.85 (+/-1.18) | C1: 39.38 (+/-1.25)<br>C2: 37.47 (+/-0.77) |
| S9-15°                | Sulfate limitation, 15°C      | C1: 7.40 (+/-4.34)                         | C1: 12.54 (+/-3.70)                        |
| S10-15°               | Sulfate limitation, 15°C      | C1: 12.26 (+/-1.26)                        | C1: 41.01 (+/-4.03)                        |
| P1-15°                | Phosphate limitation, 15°C    | C1: 7.05 (+/-0.59)<br>C2: 9.68 (+/-0.76)   | C1: -4.81 (+/-1.62)<br>C2: 0.40 (+/-0.79)  |
| P2-15°                | Phosphate limitation, 15°C    | C1: -2.16 (+/-1.60)<br>C2: -2.26(+/-1.16)  | C1: -3.82 (+/-0.69)<br>C2: 9.34 (+/-0.76)  |
| P3-15°                | Phosphate limitation, 15°C    | C1: 8.01 (+/-1.55)<br>C2: 4.80 (+/-1.07)   | C1: -7.59 (+/-0.52)<br>C2: 0.76 (+/-2.30)  |
| P4-15°                | Phosphate limitation, 15°C    | C1: -0.26 (+/-1.00)<br>C2: -0.33 (+/-2.51) | C1: 14.87 (+/-2.21)<br>C2: -0.58 (+/-2.55) |
| P5-15°                | Phosphate limitation, 15°C    | C1: 16.46 (+/-3.73)<br>C2: 12.69 (+/-3.44) | C1: 10.48 (+/-1.16)                        |
| P6-15°                | Phosphate limitation, 15°C    | C1: 6.66 (+/-2.66)<br>C2: 6.90 (+/-4.15)   | C1: 10.49 (+/-1.45)                        |
| P1-30°                | Phosphate limitation, 30°C    | 21.01                                      | 29.18 (+/-1.37)                            |
| P2-30°                | Phosphate limitation, 30°C    | 14.55 (+/-2.94)                            | 25.34 (+/-0.24)                            |
| P3-30°                | Phosphate limitation, 30°C    | 5.25 (+/-1.77)                             | 30.03 (+/-4.31)                            |
| P5-30°                | Phosphate limitation, 30°C    | -8.14 (+/-0.81)                            | 30.24 (+/-8.32)                            |
| P4-30°                | Phosphate limitation, 30°C    | -10.98 (+/-2.35)                           | 27.02 (+/-3.62)                            |
| P6-30°                | Phosphate limitation, 30°C    | -2.06 (+/-0.66)                            | 25.52 (+/-3.32)                            |

252

253 One or two clones (denoted as C1, C2) were selected from each cold-evolved population and competed against a  
 254 GFP-tagged ancestor in the nutrient limitation they in which they were evolved at both 15°C and 30°C. Six clones  
 255 evolved in phosphate limitation at 30°C from Smukowski Heil et al. 2017 were also tested at 15°C (fitness data at  
 256 30°C in [60]).

257

258 *Single nucleotide variants show no overlap with previous study, occurrence shows slight S.*

259 *cerevisiae sub-genome bias in hybrids*

260 Through comparison of the single nucleotide variants and indels called in the hybrid

261 populations evolved at 15°C and 30°C, we observed a slight, though not significant, increase in

262 the number of mutations in the *S. cerevisiae* portion of the genome when evolved at temperatures  
263 preferred by *S. uvarum* (12/19 mutations are in the *S. cerevisiae* sub-genome at 15°C compared  
264 to 16/30 mutations in the *S. cerevisiae* sub-genome at 30°C, Fisher's exact test  $p=0.5636$ ; **Table**  
265 **S3**). We speculate that the relationship between the number of detectable, high-frequency  
266 mutations and growth temperature could be reflective of the degree to which either species is  
267 shifted from its optimal environment, and a difference in the size of the adaptive space available.  
268 There was no overlap in genes with variants identified in datasets from 15°C and 30°C.

269 We suspect that the low growth temperature is a selective pressure for both the hybrids  
270 and the parental populations, and we did observe mutations in two genes (*BNA7* and *OTUI*) that  
271 were previously identified in a study of transcriptional differences of *S. cerevisiae* in long-term,  
272 glucose-limited, cold chemostat exposure [76]. We found no overlap with genes previously  
273 identified to be essential for growth in the cold [77,78], or differentially expressed during short-  
274 term cold exposure [79,80], though our screen is hardly saturated and growth conditions differ  
275 between these studies. Additionally, we observed some mutations in genes that are members of  
276 the cAMP-PKA pathway, which has been previously implicated in cold and nutrient-limitation  
277 adaptation [76,81].

278 Based on the mutations observed in populations evolved at 30°C, we previously  
279 hypothesized that an intergenomic conflict between the nuclear and mitochondrial genome of *S.*  
280 *cerevisiae* and *S. uvarum* is an important selection pressure during the evolution of these hybrids  
281 [60]. We find further circumstantial evidence for the possibility that mitochondrial conflicts are  
282 influential in hybrid evolution as 3/19 point mutations in the hybrids are related to mitochondrial  
283 function, whereas 1/20 are related in the parental species populations.

284 Finally, we did observe one recurrent mutational target. Eight independent *S. cerevisiae*  
285 diploid lineages had a substitution occur at 1 of 3 different amino acid positions in Tpk2, a  
286 cAMP-dependent protein kinase catalytic subunit. Previously, it has been reported that Tpk2 is a  
287 key regulator of the cell sticking phenotype known as flocculation through inactivation of Sfl1, a  
288 negative regulator of *FLO11*, and activation of *FLO8*, a positive regulator of *FLO11* [82,83].  
289 This mutation was detected exclusively in flocculent populations. We and others have previously  
290 established that flocculation evolves quite frequently in the chemostat, likely as an adaptation to  
291 the device itself, but we have not previously observed a flocculation phenotype caused by these  
292 mutations in other evolved populations of *S. cerevisiae* [84]. While we have not definitively  
293 demonstrated causation, prior literature links *TPK2* to flocculation, and all evolved clones  
294 bearing a *TPK2* mutation flocculated within seconds of resuspension by vortexing (**Figure S8**).  
295 Most mutations were heterozygous, but within several lineages, we observed evidence of a LOH  
296 event that caused the *TPK2* mutation to become homozygous. Clones bearing a homozygous  
297 mutation in *TPK2* showed a faster flocculation phenotype than their heterozygous counterparts.  
298 We similarly observed one lineage with a mutation causing a pre-mature stop and subsequent  
299 LOH in *SFL1*, whose isolated clones displayed a robust flocculation phenotype. We suspect that  
300 our previous lack of detection is likely due to the well-established genetic differences in the  
301 *FLO8* gene between the strains used in this study and previous studies, which would alter  
302 whether a *FLO8* dependent flocculation phenotype is possible [85].

303

## 304 **Discussion**

305 In summary, we evolved populations of interspecific hybrids at cold temperatures and  
306 show that temperature can influence parental representation in a hybrid genome. We find a

307 variety of mutations whose annotated function is associated with temperature or nutrient  
308 limitation, including both previously described and novel genes. Most notably, we discover a  
309 temperature and species specific gene by environment interaction in hybrids, which empirically  
310 demonstrates that temperature influences hybrid genome evolution.

311 Growth temperature appears to be one of the most definitive phenotypic differences  
312 between species of the *Saccharomyces* clade, with *S. cerevisiae* being exceptionally  
313 thermotolerant, while many other species exhibit cold tolerance [86-88]. Significant work has  
314 focused on determining the genetic basis of thermotolerance in *S. cerevisiae* with less attention  
315 devoted to cold tolerance, though numerous genes and pathways have been implicated [77-  
316 80,89-93]. Hybrids may offer a unique pathway for coping with temperatures above or below the  
317 optimal growing temperature of one parent [45,94,95], and may aid in the identification of genes  
318 important in temperature tolerance. For example, it has long been speculated that the  
319 allopolyploid hybrid yeast *S. pastorianus* (*S. cerevisiae* x *S. eubayanus*) tolerates the cold  
320 temperatures utilized in lager beer production due to the sub-genome of the cold adapted *S.*  
321 *eubayanus* [49-54,96-98]. Indeed, creation of *de novo* hybrids between *S. cerevisiae* and cold  
322 tolerant species *S. uvarum*, *S. eubayanus*, *S. arboricola*, and *S. mikatae* all show similar ability to  
323 ferment at 12°C [98]. A pair of recent studies show that mitochondrial inheritance in hybrids is  
324 also important in heat and cold tolerance, with the *S. cerevisiae* mitotype conferring heat  
325 tolerance and *S. uvarum* and *S. eubayanus* mitotypes conferring cold tolerance [95,99]. The  
326 hybrid ancestor used for our laboratory evolution experiments at both 15°C and 30°C has *S.*  
327 *cerevisiae* mitochondria, but exploring how this has influenced the evolution of these hybrids is  
328 worthy of further work.

329            Though our work here is complicated by utilizing multiple selection pressures (nutrient  
330 limitation and cold temperature), several patterns are suggestive of temperature specific  
331 adaptations in evolved hybrids. We see a slight single nucleotide variant bias towards *S.*  
332 *cerevisiae* mutations, we observe LOH events exclusively favoring the retention of the *S. uvarum*  
333 allele, and we demonstrate a fitness advantage of the *S. uvarum* allele compared to the *S.*  
334 *cerevisiae* allele at *PHO84*. The temperature sensitivity of the *PHO84* allele is a curious  
335 phenomenon for which we do not have a clear understanding. The phosphate metabolism  
336 pathway was recently implicated in temperature sensitivity in *S. cerevisiae* x *S. uvarum* hybrids:  
337 more specifically, *S. cerevisiae* alleles of 12 phosphate metabolism genes showed significantly  
338 higher expression at 37°C than *S. uvarum* alleles (no significant difference at 22°C or 33°C). *S.*  
339 *cerevisiae* *PHO84* was one of only a handful of genes whose expression was shown to be  
340 downregulated at 4°C and upregulated at 35°C [90]. These results are consistent with our  
341 observations from fitness assays that the *S. cerevisiae* *PHO84* allele is temperature sensitive,  
342 yielding high fitness at high temperatures. One potential connection is the need for inorganic  
343 phosphate for various processes involved in stress response, including heat shock and activation  
344 of the PKA pathway, of which *PHO84* is required [100-103]. This gene provides an interesting  
345 example of identifying a gene and pathway previously not appreciated for a role in temperature  
346 adaptation, and highlights using multiple environments to better understand parental species  
347 preferences and potentially environment specific incompatibilities.

348            More broadly, through the lens of *PHO84*, we establish LOH as an important molecular  
349 mechanism in hybrid adaptation, but we also demonstrate that this mutation type has fitness  
350 tradeoffs. The selection of a particular species allele may confer a fitness advantage in a given  
351 environment, but at a risk of extinction if the environment changes. Furthermore, such mutations

352 rarely affect single genes, and instead operate on multigenic genomic segments, leading to a  
353 further pleiotropic benefit and/or risk even in environments unrelated to the initial selective  
354 regime. Relatively constant environments such as those found in the production of beer and wine  
355 may offer fewer such risks, where hybrids may find a particular niche that is less variable than  
356 their natural environment. Future efforts are warranted to explore how variable environments  
357 influence hybrid evolution and the extent of antagonistic pleiotropy in hybrid genomes.  
358 However, because LOH has been documented in a variety of different genera and taxa that  
359 experience a range of environments, it's likely that our results have broad implications.

360         In conclusion, we illuminate pathways in which hybridization may allow adaptation to  
361 different temperature conditions. Mounting evidence suggests that anthropogenic climate change  
362 and habitat degradation are leading both to new niches that can be occupied by hybrids, as well  
363 as to new opportunities for hybridization due to changes in species distribution and breakdown of  
364 prezygotic reproductive isolation barriers [104-106]. Some researchers have speculated that this  
365 process is particularly likely in the arctic, where numerous hybrids have already been identified  
366 [107]. Our work supports the idea that portions of these hybrid genomes can be biased in  
367 parental representation by the environment in the initial generations following hybridization, and  
368 that this selection on species genetic variation may be beneficial or detrimental as conditions  
369 change.

370

## 371 **Materials and Methods**

372 *Strains*

373 Strains used to inoculate the laboratory evolution experiments and to gauge relative fitness of  
374 *PHO84* allele replacements in competition assays were previously utilized by Smukowski Heil et  
375 al. [60]. All strains are listed in **Table S4**.

376

### 377 *Evolution experiments*

378 Continuous cultures were established using media and conditions previously described with  
379 several modifications to account for a temperature of 15°C [60,66]. Individual cultures were  
380 maintained in a 4°C room in a water bath such that the temperature the cultures experienced was  
381 15°C, as monitored by a separate culture vessel containing a thermometer. The dilution rate was  
382 adjusted to approximately 0.08, equating to about 3 generations per day. Samples were taken  
383 twice a week and measured for optical density at 600 nm and cell count; microscopy was  
384 performed to check for contamination; and archival glycerol stocks were made. By 200  
385 generations, 2/16 hybrid populations, 10/12 *S. cerevisiae* diploid populations, and 0/6 *S. uvarum*  
386 diploid populations had evolved a cell-cell sticking phenotype consistent with flocculation. The  
387 experiment was terminated at 200 generations and flocculent and non-flocculent populations  
388 were sampled from the final timepoint and submitted for whole genome sequencing (40  
389 populations total, some cultures had only a flocculent or non-flocculent population while some  
390 cultures had both sub-populations). Populations from vessels that experienced flocculation were  
391 isolated as described in [84], and are denoted with “F”.

392

### 393 *Genome sequencing and analysis*

394 DNA was extracted from each population using the Hoffman–Winston protocol (Hoffman and  
395 Winston 1987) and cleaned using the Clean & Concentrator kit (Zymo Research). Nextera

396 libraries were prepared following the Nextera library kit protocol and sequenced using paired  
397 end 150 bp reads on the Illumina NextSeq 500 machine. The reference genomes used were *S.*  
398 *cerevisiae* v3 (Engel et al. 2014), *S. uvarum* (Scannell et al. 2011), and a hybrid reference  
399 genome created by concatenating the two genomes.

400 Variant calling was conducted on each population using two separate pipelines. For the  
401 first pipeline, we trimmed reads using trimmomatic/0.32 and aligned reads to their respective  
402 genomes (*S. cerevisiae*, *S. uvarum*, or a concatenated hybrid genome) using the mem algorithm  
403 from BWA/0.7.13, and manipulated the resulting files using Samtools/1.7. Duplicates were then  
404 removed using picard/2.6.0, and the indels were realigned using GATK/3.7. Variants were then  
405 called using Samtools (bcftools/1.5 with the `-A` and `-B` arguments), freebayes and lofreq/2.1.2.  
406 The variants were then filtered using bcftools/1.5 for quality scores above 10 and read depth  
407 above 20. For the second pipeline, reads were trimmed using Trimmomatic/0.32 and aligned  
408 using Bowtie2/2.2.3, then preprocessed in the same manner as the first pipeline. Variants were  
409 then called using lofreq/2.1.2 and freebayes/1.0.2-6-g3ce827d (using the `--pooled-discrete --`  
410 `pooled-continuous --report-genotype-likelihood-max --allele-balance-priors-off --min-alternate-`  
411 `fraction 0.05` arguments from bcbio (<https://github.com/bcbio/bcbio-nextgen>)). Variants were  
412 then filtered using bedtools/2.25.0 and the following arguments (Sup. table). In both variant  
413 calling pipelines, variants were filtered against their sequenced ancestors and annotated for gene  
414 identity, mutation type, and amino acid change consequence [108]. Final variant calls were  
415 manually confirmed through visual inspection in the Integrative Genomics Viewer [109] (1550  
416 mutations checked in total).

417 For comparisons with clones evolved at 30°C which were analyzed using a different  
418 pipeline [60], we called variants on the previously published 30°C sequencing data using the



419 same computational pipelines described here, and completely recapitulated the previous true  
420 positive variant calls.

421

#### 422 *Data availability*

423 Illumina reads generated in this study are deposited in the NCBI-SRA database under BioProject  
424 number PRJNA493117.

425

#### 426 *Fitness assays*

427 The pairwise competition experiments were performed in 20 ml chemostats as previously  
428 described [60,110]. The competition experiments performed at 15°C were modified as described  
429 above in the Evolution experiments. For all cold-evolved hybrid populations, one to two clones  
430 were isolated for use in competition experiments. Clones from P1-15° and P3-15° were PCR  
431 validated to have the chromosome XIII LOH event, but no other LOH, CNV, or single  
432 nucleotide variants were screened in these or any other clone tested.

433

#### 434 **Supporting Information**

435 **Table S1. Mutations in cold-evolved *S. cerevisiae* diploid populations.**

436 **Table S2. Mutations in cold-evolved *S. uvarum* diploid populations.**

437 **Table S3. Comparison of single nucleotide variants called in 15°C and 30°C experimental  
438 evolution.**

439 **Table S4. Strain list.**

440 **Figure S1. Copy number plots of cold-evolved hybrids populations.**

441 **Figure S2. Amplification of *SUL1* in hybrids evolved at 15°C and 30°C.**

- 442 **Figure S3. Copy number plots of cold-evolved *S. cerevisiae* diploid populations.**
- 443 **Figure S4. Copy number plots of cold-evolved, flocculent *S. cerevisiae* diploid populations.**
- 444 **Figure S5. Loss of heterozygosity plots of cold-evolved *S. cerevisiae* diploid populations.**
- 445 **Figure S6. Loss of heterozygosity plots of cold-evolved, flocculent *S. cerevisiae* diploid**
- 446 **populations.**
- 447 **Figure S7. Copy number plots of cold-evolved *S. uvarum* diploid populations.**
- 448 **Figure S8. Flocculation assay of several flocculent clones isolated from *S. cerevisiae* cold-**
- 449 **evolved populations.**

450

#### 451 **Acknowledgements**

452 We thank Angela Hickey for assistance with fitness assays. This work was supported by the

453 National Science Foundation (grant number 1516330). M.J.D. is a Senior Fellow in the Genetic

454 Networks program at the Canadian Institute for Advanced Research and a Rita Allen Foundation

455 Scholar. M.J.D. is supported in part by a Faculty Scholars grant from the Howard Hughes

456 Medical Institute.

457

#### 458 **Author Contributions**

459 C.S.H. and M.J.D. designed the experiment; C.S.H., C.R.L., and K.P. conducted experiments;

460 C.S.H. and C.R.L. conducted data analysis; and C.S.H., C.R.L., and M.J.D. wrote the paper.

461

## 462 **References**

- 463 1. Emery M, Willis MMS, Hao Y, Barry K, Oakgrove K, et al. (2018) Preferential retention of genes from  
464 one parental genome after polyploidy illustrates the nature and scope of the genomic conflicts  
465 induced by hybridization. *PLoS Genet* 14: e1007267.
- 466 2. Louis VL, Despons L, Friedrich A, Martin T, Durrrens P, et al. (2012) *Pichia sorbitophila*, an Interspecies  
467 Yeast Hybrid, Reveals Early Steps of Genome Resolution After Polyploidization. *G3-Genes*  
468 *Genomes Genetics* 2: 299-311.
- 469 3. Prysycz LP, Nemeth T, Gacser A, Gabaldon T (2014) Genome Comparison of *Candida orthopsilosis*  
470 Clinical Strains Reveals the Existence of Hybrids between Two Distinct Subspecies. *Genome*  
471 *Biology and Evolution* 6: 1069-1078.
- 472 4. Buggs RJ, Chamala S, Wu W, Gao L, May GD, et al. (2010) Characterization of duplicate gene evolution  
473 in the recent natural allopolyploid *Tragopogon miscellus* by next-generation sequencing and  
474 Sequenom iPLEX MassARRAY genotyping. *Mol Ecol* 19 Suppl 1: 132-146.
- 475 5. Wang J, Tian L, Lee HS, Wei NE, Jiang H, et al. (2006) Genomewide nonadditive gene regulation in  
476 *Arabidopsis* allotetraploids. *Genetics* 172: 507-517.
- 477 6. Cheng F, Wu J, Fang L, Sun SL, Liu B, et al. (2012) Biased Gene Fractionation and Dominant Gene  
478 Expression among the Subgenomes of *Brassica rapa*. *Plos One* 7.
- 479 7. Schnable JC, Springer NM, Freeling M (2011) Differentiation of the maize subgenomes by genome  
480 dominance and both ancient and ongoing gene loss. *Proceedings of the National Academy of*  
481 *Sciences of the United States of America* 108: 4069-4074.
- 482 8. Albertin W, Marullo P (2012) Polyploidy in fungi: evolution after whole-genome duplication.  
483 *Proceedings of the Royal Society B-Biological Sciences* 279: 2497-2509.
- 484 9. Soltis DE, Visger CJ, Soltis PS (2014) The Polyploidy Revolution Then...And Now: Stebbins Revisited.  
485 *American Journal of Botany* 101: 1057-1078.
- 486 10. Coyne JA, Orr HA (2004) *Speciation*. Sunderland, Mass.: Sinauer Associates. xiii, 545, 542 p. of plates  
487 p.
- 488 11. Schumer M, Xu CL, Powell DL, Durvasula A, Skov L, et al. (2018) Natural selection interacts with  
489 recombination to shape the evolution of hybrid genomes. *Science* 360: 656-659.
- 490 12. Sankararaman S, Mallick S, Dannemann M, Prufer K, Kelso J, et al. (2014) The genomic landscape of  
491 Neanderthal ancestry in present-day humans. *Nature* 507: 354-+.
- 492 13. Juric I, Aeschbacher S, Coop G (2016) The Strength of Selection against Neanderthal Introgression.  
493 *PLoS Genetics* 12.
- 494 14. Huerta-Sanchez E, Jin X, Asan, Bianba Z, Peter BM, et al. (2014) Altitude adaptation in Tibetans  
495 caused by introgression of Denisovan-like DNA. *Nature* 512: 194-197.
- 496 15. Dasmahapatra KK, Walters JR, Briscoe AD, Davey JW, Whibley A, et al. (2012) Butterfly genome  
497 reveals promiscuous exchange of mimicry adaptations among species. *Nature* 487: 94-98.
- 498 16. Suarez-Gonzalez A, Lexer C, Cronk QCB (2018) Adaptive introgression: a plant perspective. *Biology*  
499 *Letters* 14.
- 500 17. Norris LC, Main BJ, Lee Y, Collier TC, Fofana A, et al. (2015) Adaptive introgression in an African  
501 malaria mosquito coincident with the increased usage of insecticide-treated bed nets.  
502 *Proceedings of the National Academy of Sciences of the United States of America* 112: 815-820.
- 503 18. Song Y, Endepols S, Klemann N, Richter D, Matuschka FR, et al. (2011) Adaptive Introgression of  
504 Anticoagulant Rodent Poison Resistance by Hybridization between Old World Mice. *Current*  
505 *Biology* 21: 1296-1301.
- 506 19. Jones MR, Mills LS, Alves PC, Callahan CM, Alves JM, et al. (2018) Adaptive introgression underlies  
507 polymorphic seasonal camouflage in snowshoe hares. *Science* 360: 1355-+.

- 508 20. Racimo F, Sankararaman S, Nielsen R, Huerta-Sanchez E (2015) Evidence for archaic adaptive  
509 introgression in humans. *Nature Reviews Genetics* 16: 359-371.
- 510 21. Richards EJ, Martin CH (2017) Adaptive introgression from distant Caribbean islands contributed to  
511 the diversification of a microendemic adaptive radiation of trophic specialist pupfishes. *Plos*  
512 *Genetics* 13.
- 513 22. Lee HY, Chou JY, Cheong L, Chang NH, Yang SY, et al. (2008) Incompatibility of Nuclear and  
514 Mitochondrial Genomes Causes Hybrid Sterility between Two Yeast Species. *Cell* 135: 1065-  
515 1073.
- 516 23. Hou J, Friedrich A, Gounot JS, Schacherer J (2015) Comprehensive survey of condition-specific  
517 reproductive isolation reveals genetic incompatibility in yeast. *Nat Commun* 6: 7214.
- 518 24. Chen C, Chen H, Lin YS, Shen JB, Shan JX, et al. (2014) A two-locus interaction causes interspecific  
519 hybrid weakness in rice. *Nat Commun* 5: 3357.
- 520 25. Fu CY, Wang F, Sun BR, Liu WG, Li JH, et al. (2013) Genetic and cytological analysis of a novel type of  
521 low temperature-dependent intrasubspecific hybrid weakness in rice. *PLoS One* 8: e73886.
- 522 26. Shii CT, Mok MC, Temple SR, Mok DWS (1980) Expression of Developmental Abnormalities in Hybrids  
523 of *Phaseolus vulgaris* L - Interaction between Temperature and Allelic Dosage. *Journal of*  
524 *Heredity* 71: 218-222.
- 525 27. Bomblies K, Lempe J, Epple P, Warthmann N, Lanz C, et al. (2007) Autoimmune response as a  
526 mechanism for a Dobzhansky-Muller-type incompatibility syndrome in plants. *Plos Biology* 5:  
527 1962-1972.
- 528 28. Jeuken MJW, Zhang NW, McHale LK, Pelgrom K, den Boer E, et al. (2009) *Rin4* Causes Hybrid  
529 Necrosis and Race-Specific Resistance in an Interspecific Lettuce Hybrid. *Plant Cell* 21: 3368-  
530 3378.
- 531 29. Saito T, Ichitani K, Suzuki T, Marubashi W, Kuboyama T (2007) Developmental observation and high  
532 temperature rescue from hybrid weakness in a cross between Japanese rice cultivars and  
533 Peruvian rice cultivar 'Jamaica'. *Breeding Science* 57: 281-288.
- 534 30. Arnold ML, Ballerini ES, Brothers AN (2012) Hybrid fitness, adaptation and evolutionary  
535 diversification: lessons learned from Louisiana Irises. *Heredity* 108: 159-166.
- 536 31. Grant PR, Grant BR (2002) Unpredictable evolution in a 30-year study of Darwin's finches. *Science*  
537 296: 707-711.
- 538 32. Grant PR, Grant BR (2010) Natural selection, speciation and Darwin's finches. *Proceedings of the*  
539 *California Academy of Sciences* 61: 245-260.
- 540 33. Salzburger W, Baric S, Sturmbauer C (2002) Speciation via introgressive hybridization in East African  
541 cichlids? *Molecular Ecology* 11: 619-625.
- 542 34. Rieseberg LH, Raymond O, Rosenthal DM, Lai Z, Livingstone K, et al. (2003) Major ecological  
543 transitions in wild sunflowers facilitated by hybridization. *Science* 301: 1211-1216.
- 544 35. Seehausen O (2004) Hybridization and adaptive radiation. *Trends in Ecology & Evolution* 19: 198-  
545 207.
- 546 36. Schwarz D, Matta BM, Shakir-Botteri NL, McPherson BA (2005) Host shift to an invasive plant triggers  
547 rapid animal hybrid speciation. *Nature* 436: 546-549.
- 548 37. Martin NH, Bouck AC, Arnold ML (2006) Detecting adaptive trait introgression between *Iris fulva* and  
549 *I. brevicaulis* in highly selective field conditions. *Genetics* 172: 2481-2489.
- 550 38. Anderson TM, vonHoldt BM, Candille SI, Musiani M, Greco C, et al. (2009) Molecular and  
551 Evolutionary History of Melanism in North American Gray Wolves. *Science* 323: 1339-1343.
- 552 39. Johnson WE, Onorato DP, Roelke ME, Land ED, Cunningham M, et al. (2010) Genetic Restoration of  
553 the Florida Panther. *Science* 329: 1641-1645.

- 554 40. Marcet-Houben M, Gabaldon T (2015) Beyond the Whole-Genome Duplication: Phylogenetic  
555 Evidence for an Ancient Interspecies Hybridization in the Baker's Yeast Lineage. *PLoS Biol* 13:  
556 e1002220.
- 557 41. Wolfe KH (2015) Origin of the Yeast Whole-Genome Duplication. *Plos Biology* 13.
- 558 42. Barbosa R, Almeida P, Safar SVB, Santos RO, Morais PB, et al. (2016) Evidence of Natural  
559 Hybridization in Brazilian Wild Lineages of *Saccharomyces cerevisiae*. *Genome Biology and*  
560 *Evolution* 8: 317-329.
- 561 43. Belloch C, Perez-Torrado R, Gonzalez SS, Perez-Ortin JE, Garcia-Martinez J, et al. (2009) Chimeric  
562 genomes of natural hybrids of *Saccharomyces cerevisiae* and *Saccharomyces kudriavzevii*. *Appl*  
563 *Environ Microbiol* 75: 2534-2544.
- 564 44. Gonzalez SS, Barrio E, Gafner J, Querol A (2006) Natural hybrids from *Saccharomyces cerevisiae*,  
565 *Saccharomyces bayanus* and *Saccharomyces kudriavzevii* in wine fermentations. *Fems Yeast*  
566 *Research* 6: 1221-1234.
- 567 45. Leducq JB, Nielly-Thibault L, Charron G, Eberlein C, Verta JP, et al. (2016) Speciation driven by  
568 hybridization and chromosomal plasticity in a wild yeast. *Nature Microbiology* 1.
- 569 46. Hittinger CT (2013) *Saccharomyces* diversity and evolution: a budding model genus. *Trends Genet*  
570 29: 309-317.
- 571 47. Marsit S, Leducq JB, Durand E, Marchant A, Filteau M, et al. (2017) Evolutionary biology through the  
572 lens of budding yeast comparative genomics. *Nature Reviews Genetics* 18: 581-598.
- 573 48. Selmecki AM, Maruvka YE, Richmond PA, Guillet M, Shoresh N, et al. (2015) Polyploidy can drive  
574 rapid adaptation in yeast. *Nature* 519: 349-+.
- 575 49. Dunn B, Sherlock G (2008) Reconstruction of the genome origins and evolution of the hybrid lager  
576 yeast *Saccharomyces pastorianus*. *Genome Res* 18: 1610-1623.
- 577 50. Gibson B, Liti G (2015) *Saccharomyces pastorianus*: genomic insights inspiring innovation for  
578 industry. *Yeast* 32: 17-27.
- 579 51. Baker E, Wang B, Bellora N, Peris D, Hulfachor AB, et al. (2015) The Genome Sequence of  
580 *Saccharomyces eubayanus* and the Domestication of Lager-Brewing Yeasts. *Molecular Biology*  
581 *and Evolution* 32: 2818-2831.
- 582 52. Nakao Y, Kanamori T, Itoh T, Kodama Y, Rainieri S, et al. (2009) Genome sequence of the lager  
583 brewing yeast, an interspecies hybrid. *DNA Res* 16: 115-129.
- 584 53. Peris D, Langdon QK, Moriarty RV, Sylvester K, Bontrager M, et al. (2016) Complex Ancestries of  
585 Lager-Brewing Hybrids Were Shaped by Standing Variation in the Wild Yeast *Saccharomyces*  
586 *eubayanus*. *PLoS Genet* 12: e1006155.
- 587 54. Walther A, Hesselbart A, Wendland J (2014) Genome sequence of *Saccharomyces carlsbergensis*, the  
588 world's first pure culture lager yeast. *G3 (Bethesda)* 4: 783-793.
- 589 55. Almeida P, Goncalves C, Teixeira S, Libkind D, Bontrager M, et al. (2014) A Gondwanan imprint on  
590 global diversity and domestication of wine and cider yeast *Saccharomyces uvarum*. *Nat*  
591 *Commun* 5: 4044.
- 592 56. Fernandez-Espinar MT, Barrio E, Querol A (2003) Analysis of the genetic variability in the species of  
593 the *Saccharomyces sensu stricto* complex. *Yeast* 20: 1213-1226.
- 594 57. Rainieri S, Zambonelli C, Hallsworth JE, Pulvirenti A, Giudici P (1999) *Saccharomyces uvarum*, a  
595 distinct group within *Saccharomyces sensu stricto*. *Fems Microbiology Letters* 177: 177-185.
- 596 58. Rodriguez ME, Perez-Traves L, Sangorrin MP, Barrio E, Querol A, et al. (2017) *Saccharomyces uvarum*  
597 is responsible for the traditional fermentation of apple chicha in Patagonia. *Fems Yeast Research*  
598 17.

- 599 59. Krogerus K, Preiss R, Gibson B (2018) A Unique *Saccharomyces cerevisiae* × *Saccharomyces uvarum*  
600 Hybrid Isolated From Norwegian Farmhouse Beer: Characterization and Reconstruction. *Front*  
601 *Microbiol* 9.
- 602 60. Smukowski Heil CS, DeSevo CG, Pai DA, Tucker CM, Hoang ML, et al. (2017) Loss of Heterozygosity  
603 Drives Adaptation in Hybrid Yeast. *Mol Biol Evol* 34: 1596-1612.
- 604 61. Schroder MS, Martinez de San Vicente K, Prandini TH, Hammel S, Higgins DG, et al. (2016) Multiple  
605 Origins of the Pathogenic Yeast *Candida orthopsilosis* by Separate Hybridizations between Two  
606 Parental Species. *PLoS Genet* 12: e1006404.
- 607 62. Li ZK, Zhang F (2013) Rice breeding in the post-genomics era: from concept to practice. *Curr Opin*  
608 *Plant Biol* 16: 261-269.
- 609 63. Stuart-Smith RD, Edgar GJ, Bates AE (2017) Thermal limits to the geographic distributions of shallow-  
610 water marine species. *Nature Ecology & Evolution* 1: 1846-+.
- 611 64. Chen IC, Hill JK, Ohlemuller R, Roy DB, Thomas CD (2011) Rapid Range Shifts of Species Associated  
612 with High Levels of Climate Warming. *Science* 333: 1024-1026.
- 613 65. Guisan A, Thuiller W (2005) Predicting species distribution: offering more than simple habitat  
614 models. *Ecology Letters* 8: 993-1009.
- 615 66. Gresham D, Desai MM, Tucker CM, Jenq HT, Pai DA, et al. (2008) The repertoire and dynamics of  
616 evolutionary adaptations to controlled nutrient-limited environments in yeast. *PLoS Genet* 4:  
617 e1000303.
- 618 67. Dunn B, Paulish T, Stanbery A, Piotrowski J, Koniges G, et al. (2013) Recurrent rearrangement during  
619 adaptive evolution in an interspecific yeast hybrid suggests a model for rapid introgression. *PLoS*  
620 *Genet* 9: e1003366.
- 621 68. Piotrowski JS, Nagarajan S, Kroll E, Stanbery A, Chiotti KE, et al. (2012) Different selective pressures  
622 lead to different genomic outcomes as newly-formed hybrid yeasts evolve. *BMC Evol Biol* 12: 46.
- 623 69. Hong J, Brandt N, Abdul-Rahman F, Yang A, Hughes T, et al. (2018) An incoherent feedforward loop  
624 facilitates adaptive tuning of gene expression. *Elife* 7.
- 625 70. Gresham D, Usaite R, Germann SM, Lisby M, Botstein D, et al. (2010) Adaptation to diverse nitrogen-  
626 limited environments by deletion or extrachromosomal element formation of the *GAP1* locus.  
627 *Proc Natl Acad Sci U S A* 107: 18551-18556.
- 628 71. Lauer S, AVECILLA G, Spealman P, Sethia G, Brandt N, et al. (2018) Single-cell copy number variant  
629 detection reveals the dynamics and diversity of adaptation. *BioRxiv*.
- 630 72. Sunshine AB, Payen C, Ong GT, Liachko I, Tan KM, et al. (2015) The fitness consequences of  
631 aneuploidy are driven by condition-dependent gene effects. *PLoS Biology* 13:e1002155.
- 632 73. Dunham MJ, Badrane H, Ferea T, Adams J, Brown PO, et al. (2002) Characteristic genome  
633 rearrangements in experimental evolution of *Saccharomyces cerevisiae*. *Proc Natl Acad Sci U S A*  
634 99: 16144-16149.
- 635 74. Payen C, Di Rienzi SC, Ong GT, Pogachar JL, Sanchez JC, et al. (2014) The dynamics of diverse  
636 segmental amplifications in populations of *Saccharomyces cerevisiae* adapting to strong  
637 selection. *G3 (Bethesda)* 4: 399-409.
- 638 75. Sanchez MR, Miller AW, Liachko I, Sunshine AB, Lynch B, et al. (2017) Differential paralog divergence  
639 modulates genome evolution across yeast species. *PLoS Genet* 13: e1006585.
- 640 76. Tai SL, Daran-Lapujade P, Walsh MC, Pronk JT, Daran JM (2007) Acclimation of *Saccharomyces*  
641 *cerevisiae* to low temperature: A chemostat-based transcriptome analysis. *Molecular Biology of*  
642 *the Cell* 18: 5100-5112.
- 643 77. Abe F, Minegishi H (2008) Global screening of genes essential for growth in high-pressure and cold  
644 environments: Searching for basic adaptive strategies using a yeast deletion library. *Genetics*  
645 178: 851-872.

- 646 78. Garcia-Rios E, Ramos-Alonso L, Guillamon JM (2016) Correlation between Low Temperature  
647 Adaptation and Oxidative Stress in *Saccharomyces cerevisiae*. *Frontiers in Microbiology* 7.  
648 79. Lashkari DA, DeRisi JL, McCusker JH, Namath AF, Gentile C, et al. (1997) Yeast microarrays for  
649 genome wide parallel genetic and gene expression analysis. *Proceedings of the National*  
650 *Academy of Sciences of the United States of America* 94: 13057-13062.  
651 80. Kandror O, Bretschneider N, Kreydin E, Cavalieri D, Goldberg AL (2004) Yeast adapt to near-freezing  
652 temperatures by *STRE/Msn2,4*-dependent induction of trehalose synthesis and certain  
653 molecular chaperones. *Molecular Cell* 13: 771-781.  
654 81. Sahara T, Goda T, Ohgiya S (2002) Comprehensive expression analysis of time-dependent genetic  
655 responses in yeast cells to low temperature. *Journal of Biological Chemistry* 277: 50015-50021.  
656 82. Robertson LS, Fink GR (1998) The three yeast A kinases have specific signaling functions in  
657 pseudohyphal growth. *Proceedings of the National Academy of Sciences of the United States of*  
658 *America* 95: 13783-13787.  
659 83. Conlan RS, Tzamarias D (2001) *Sfl1* functions via the co-repressor *Ssn6-Tup1* and the cAMP-  
660 dependent protein kinase *Tpk2*. *Journal of Molecular Biology* 309: 1007-1015.  
661 84. Hope EA, Amorosi CJ, Miller AW, Dang K, Heil CS, et al. (2017) Experimental Evolution Reveals  
662 Favored Adaptive Routes to Cell Aggregation in Yeast. *Genetics* 206: 1153-1167.  
663 85. Liu H, Styles CA, Fink GR (1996) *Saccharomyces cerevisiae* S288C has a mutation in *FLO8*, a gene  
664 required for filamentous growth. *Genetics* 144: 967-978.  
665 86. Weiss C, Roop JI, Hackley R, Chuong J, Grigoriev IV, et al. (2018) Genetic dissection of an ancient  
666 divergence in yeast thermotolerance. *BioRxiv*.  
667 87. Singer MA, Lindquist S (1998) Thermotolerance in *Saccharomyces cerevisiae*: the Yin and Yang of  
668 trehalose. *Trends Biotechnol* 16: 460-468.  
669 88. Goncalves P, Valerio E, Correia C, de Almeida JM, Sampaio JP (2011) Evidence for divergent evolution  
670 of growth temperature preference in sympatric *Saccharomyces* species. *PLoS One* 6: e20739.  
671 89. Aguilera J, Randez-Gil F, Prieto JA (2007) Cold response in *Saccharomyces cerevisiae*: new functions  
672 for old mechanisms. *FEMS Microbiol Rev* 31: 327-341.  
673 90. Homma T, Iwahashi H, Komatsu Y (2003) Yeast gene expression during growth at low temperature.  
674 *Cryobiology* 46: 230-237.  
675 91. Phadtare S, Alsina J, Inouye M (1999) Cold shock response and cold-shock proteins. *Current Opinion*  
676 *in Microbiology* 2: 175-180.  
677 92. Rodriguez-Vargas S, Estruch F, Randez-Gil F (2002) Gene expression analysis of cold and freeze stress  
678 in baker's yeast. *Applied and Environmental Microbiology* 68: 3024-3030.  
679 93. Paget CM, Schwartz JM, Delneri D (2014) Environmental systems biology of cold-tolerant phenotype  
680 in *Saccharomyces* species adapted to grow at different temperatures. *Molecular Ecology* 23:  
681 5241-5257.  
682 94. Greig D, Louis EJ, Borts RH, Travisano M (2002) Hybrid speciation in experimental populations of  
683 yeast. *Science* 298: 1773-1775.  
684 95. Li XC, Peris D, Hittinger CT, Sia EA, Fay JC (2018) Mitochondria-encoded genes contribute to the  
685 evolution of heat and cold tolerance among *Saccharomyces* species. *BioRxiv*.  
686 96. Hebly M, Brickwedde A, Bolat I, Driessen MRM, de Hulster EAF, et al. (2015) *S. cerevisiae* x *S.*  
687 *eubayanus* interspecific hybrid, the best of both worlds and beyond. *Fems Yeast Research* 15.  
688 97. Libkind D, Hittinger CT, Valerio E, Goncalves C, Dover J, et al. (2011) Microbe domestication and the  
689 identification of the wild genetic stock of lager-brewing yeast. *Proc Natl Acad Sci U S A* 108:  
690 14539-14544.  
691 98. Nikulin J, Krogerus K, Gibson B (2018) Alternative *Saccharomyces* interspecies hybrid combinations  
692 and their potential for low-temperature wort fermentation. *Yeast* 35: 113-127.

- 693 99. Baker EP, Peris D, Moriarty RV, Li XC, Fay JC, et al. (2018) Mitochondrial DNA and temperature  
694 tolerance in lager yeasts. *BioRxiv*.
- 695 100. Parrou JL, Teste MA, Francois J (1997) Effects of various types of stress on the metabolism of  
696 reserve carbohydrates in *Saccharomyces cerevisiae*: Genetic evidence for a stress-induced  
697 recycling of glycogen and trehalose. *Microbiology-Uk* 143: 1891-1900.
- 698 101. Francois J, Parrou JL (2001) Reserve carbohydrates metabolism in the yeast *Saccharomyces*  
699 *cerevisiae*. *Fems Microbiology Reviews* 25: 125-145.
- 700 102. Popova Y, Thayumanavan P, Lonati E, Agrochao M, Thevelein JM (2010) Transport and signaling  
701 through the phosphate-binding site of the yeast Pho84 phosphate transceptor. *Proceedings of*  
702 *the National Academy of Sciences of the United States of America* 107: 2890-2895.
- 703 103. Secco D, Wang C, Shou HX, Whelan J (2012) Phosphate homeostasis in the yeast *Saccharomyces*  
704 *cerevisiae*, the key role of the SPX domain-containing proteins. *Febs Letters* 586: 289-295.
- 705 104. Hoffmann AA, Sgro CM (2011) Climate change and evolutionary adaptation. *Nature* 470: 479-485.
- 706 105. Abbott R, Albach D, Ansell S, Arntzen JW, Baird SJ, et al. (2013) Hybridization and speciation. *J Evol*  
707 *Biol* 26: 229-246.
- 708 106. Grabenstein KC, Taylor SA (2018) Breaking Barriers: Causes, Consequences, and Experimental Utility  
709 of Human-Mediated Hybridization. *Trends in Ecology & Evolution* 33: 198-212.
- 710 107. Kelly B, Whiteley A, Tallmon D (2010) The Arctic melting pot. *Nature* 468: 891-891.
- 711 108. Pashkova N, Gakhar L, Winistorfer SC, Sunshine AB, Rich M, et al. (2013) The Yeast Alix Homolog  
712 Bro1 Functions as a Ubiquitin Receptor for Protein Sorting into Multivesicular Endosomes.  
713 *Developmental Cell* 25: 520-533.
- 714 109. Robinson JT, Thorvaldsdottir H, Winckler W, Guttman M, Lander ES, et al. (2011) Integrative  
715 genomics viewer. *Nature Biotechnology* 29: 24-26.
- 716 110. Miller AW, Dunham MJ (2013) Design and use of multiplexed chemostat arrays. *Journal of*  
717 *Visualized Experiments* 72.

718
